# Supplementary material for: Sox genes in the coral Acropora millepora: divergent expression patterns reflect differences in developmental mechanisms within the Anthozoa
Source: PubMed Central journal article supplement (PMC2613919; doi:10.1186/1471-2148-8-311), 2008-11-12
Supplement: 1471-2148-8-311-S1.pdf [file 1471-2148-8-311-S1.pdf]

A

1 AGA GGC TAC CTC GAC ACA AGC ACA AAG GAA CTC TCG ACA GAC CGT CAG AAA TTT  
57 GTC GTG GAA TAT TCC ACT GCT GTT GGC AAA GAG TTA ATT TTG TTT GAG TTC GTA  
111 GAG TTG GAT TGA ACA ATG TCC ACG ACC ACA ATT TTG ACA TCG TCG CCA AAT GCG  
M S T T T I L T S S P N A 13  
165 GGC TCG AAC TCG AAC GCC GAG AAG AAT GAA AAA TGT AGT CCA GAC CGT GTC AAG  
G S N S N A E S N G K C S P D R V K 31  
219 CGA CCC ATG AAT GCT TTT ATG GTT TGG AGC AGA GAG CGG GCA CGC CGT ATG GCT  
R P M N A F M V W S R E R R R R M A 49  
273 CAA GAA AAT CCG AAG ATG CAC AAC TCA GAA ATT TCG AAG CGT TTG GGT GCG GAA  
Q E N P K M H N S E I S K R L G A E 67  
327 TGG AAA CAG TTA TCC GAC CCG GAA AAG CGC CTT TAT GTT GAC GAA GCG AAG AGA  
W K Q L S D P E K R P Y V D E A K R 85  
381 TTG GCA GCG GTT CAT ATG AAA GAC CAC CCT GAC TAC AAA TAC AGA CCA AGG CGA  
L R A V H M K D H P D Y K Y R P R R 103  
435 AAG AGT AAA ACT TTA CTC AAG AAG GAT AAC AAG TAC ACT TTG TCA ATG CTT GGC  
K S K T L L K K D N K Y T L S M L G 121  
489 GCA CAA GGT GGT CCA CTA GTA CAG AGA TCA ATG GTG CAA AAT CCG GCC GAT CAT  
A Q G G P P V Q R S M V Q N P A D H 139  
543 TTT GGA CAG ATG AAC GGT TTC GCT TAT AGT CCC ATT ACG GGC TAC AAC CAA ATG  
F G Q M N G F A Y S P I T G Y N Q M 157  
597 AAT GTC AAT GAT CCC TAC AGT AAT ATA TAC GCT GGT CAT CCT CTC TGA CCG CAT  
N V N D P Y S N I Y A G H P L S P H 175  
651 ACC CCT ACA CAA ATA CAG CCG TCG AAC GGT CTT CAC CAC ACC GCT TAT TCG CAT  
T P T Q I Q P S N G L H H T A Y S H 193

705 ATG GGA GGA AGT GGT CAG ATT TAC TCC ACA GTT TCT ACC CAA GGA CAA GTT TAT  
M G G S G Q I Y S T V S T Q G Q V Y 211  
759 GCC TTG AAT GGG ACT CAA TCG ATG AAC TCG ATT TCA CCG CTG TCG TAC TCA CAA  
A L N G T Q S M N S I S P L S Y S Q 229  
813 CCT AGC AAT CAA GCT CTT ATT CCA AAC ATT AAA CAA GAA ATG CCT AGT CCG GTT  
P S N Q V L I P N I K Q E M P S P G 247  
867 TCG CAG TCG AGT GCG GGT CGT AGC TGT ACA GAT CAA CTT GGA GAC ATG ATA AAC  
S Q S S R G R S C T D Q L G D M I N 265  
921 ACT TAT CTT CCT GGC GAA AGC GCT GCG GCA AGC GCA AAC GCA AAC CAT CAC CCC  
T Y L P G E S A A A S A N A N H H P 283  
975 GTT ACT GCA AGC CAT CAT ATT CCG CCA AAT CGC TAC AGC CAG TGG CAA GAG CAG  
V T A S H H I P P N R Y S Q W Q E Q 301  
1029 AGC TCT GTG GCG AAC AGC AAT TTA CTT GCT CAT AGT GGT GTA CCT GCG CCA AGT  
S V A N S N L P V H S G V P A P S 319  
1083 ATT TCC AGT GTT TCT GGA GTG AGT GGG ACC ATT CCG TTA ACT CAT ATG CCC TGA  
I S S V S G V S G T I P L T H M P \* 336  
1137 GCG TCC AAT TGG CTG AAT TTT CGG CTC ATT TTC TTC CCG GCA TTG CCG TAA ATT  
1191 TAT TCT TTG TTT TGC TAC CCG ACT TGT CTG GTT CGT GAA TTG AGA GAT GAC GGA  
1245 AGG AAA AGG AGA CGA GAT TTC TTG ACA AAG ACT TTC GTC TTT GAG AGT CAA AAT  
1299 ATA AGA GAA GGG CGC ACT GAG AAG AAG TTA AAG TCC AAC AGC TTT TCC GAC  
1353 GGG GAG CAG AAT TGG GCA GTA AAG TTT AGT CAA ATT TAT GAA CTG TGC CGA GGA  
1407 GTT ATT TAA GAT ACT AGT TAA CAG TCT CTA TGG ATA TGA GAG TGA CCA ACC CAG  
1461 TCG AAA ACT AAA GCG AAG TTA ATT GTA ATG ACG TGT GTG ATG ACA ATA CAC TCA  
1515 CTC ACT AGA TTG TAT CAG ACG TAA GAA GAA AAA AAT TTT TGT TAG GAA AGG TGG  
1569 TTT GTT GTT AGC GCT CGA GCA GAA CAA AAT GTT GCG AAA TGC ATT CAT TGC  
1623 TTG CTC GAT CAT ACT TTT GAA CTT TTG GTC TTT GTT GGC CTT ATT TGA ATT  
1677 GCT TTG TAG AAT TAA TGC ACG TTT GTA TGA ATT TCT AAC TCG TCT GTC TAC CGT  
1731 GCT AAT ATC CCT GAG TAT TGC CAA GIT CAG TAA ATT ATA TCT TTG TGA ACA CCT  
1785 TCA CTT GTA CAT AAC TTC AAA CCA AAG AGA GAT AAT ATT TCC TTT ATT TTC  
1839 CTT TTG AAG AAA TAA AAC AGC ACA TTG AAA GAA AAA AAA AAA AAA AA

B

AmSoxBl 1  
NvSoxBl 1  
SkSox1/2/3 1  
SpSoxBl 1  
CiSoxBl 1  
CeSoxBl 1  
DmSoxBl 1  
XlSox3 1  
MmSox2 1  
-----  
AmSoxBl 1  
NvSoxBl 1  
SkSox1/2/3 1  
SpSoxBl 1  
CiSoxBl 1  
CeSoxBl 1  
DmSoxBl 1  
XlSox3 8  
MmSox2 1  
-----  
AmSoxBl 1  
NvSoxBl 1  
SkSox1/2/3 1  
SpSoxBl 1  
CiSoxBl 1  
CeSoxBl 1  
DmSoxBl 161  
XlSox3 3  
MmSox2 34  
-----  
AmSoxBl 1  
NvSoxBl 1  
SkSox1/2/3 1  
SpSoxBl 1  
CiSoxBl 1  
CeSoxBl 1  
DmSoxBl 234  
XlSox3 96  
MmSox2 99  
-----  
AmSoxBl 159  
NvSoxBl 162  
SkSox1/2/3 169  
SpSoxBl 190  
CiSoxBl 170  
CeSoxBl 156  
DmSoxBl 314  
XlSox3 164  
MmSox2 175  
-----  
AmSoxBl 221  
NvSoxBl 230  
SkSox1/2/3 229  
SpSoxBl 249  
CiSoxBl 241  
CeSoxBl 215  
DmSoxBl 394  
XlSox3 228  
MmSox2 236  
-----  
AmSoxBl 249  
NvSoxBl 257  
SkSox1/2/3 253  
SpSoxBl 277  
CiSoxBl 266  
CeSoxBl 236  
DmSoxBl 474  
XlSox3 250  
MmSox2 258  
-----  
AmSoxBl 318  
NvSoxBl 326  
SkSox1/2/3 298  
SpSoxBl 327  
CiSoxBl 336  
CeSoxBl 1  
DmSoxBl 554  
XlSox3 129  
MmSox2 304  
-----
