# Supplementary material for: Sox genes in the coral Acropora millepora: divergent expression patterns reflect differences in developmental mechanisms within the Anthozoa
Source: PubMed Central journal article supplement (PMC2613919; doi:10.1186/1471-2148-8-311), 2008-11-12
Supplement: 1471-2148-8-311-S2.pdf [file 1471-2148-8-311-S2.pdf]

A

```

1  ATG GGC AAG CAA GAG GAA GGG CAT ATA AAG AGA CCC ATG AAT GCA TTT ATG GTT
   M G K Q E E G H I K R P M N A F M V 18
55 TGG AGT CGT GGT AAG AGA AAG CAG TAC GCT GCC ATT AAT CCT AGG ATG CAC AAT
   W S R G K R K Q Y A A I N P R M H N 36
109 TCC GAA ATA AGC AAG CGA CTC GGC GCA GAG TGG AAA ATG CTC TCG CAA GAT GAG
   S E I S K R L G A E W K M L S Q D E 54
163 AAA GAA CCG TTC GTG GCG GAA GCT AAA CGA CTG CAA GCG ATT CAC ATC CAA GAA
   K E P F V A E A K R L Q A I H I Q E 72
217 CAT CCG GAT TAT AAA TAC AAA CCC AAG CGA CGC AAG CCA AAA TCA CTG CAG AAG
   H P D Y K Y K P K R R K P K S L Q K 90
271 AAA GAG CTA TCG GCT CCC ATG TTC TCC CCA TAC AGC TCT CCG ATG ATG GCG GTT
   K E L S G P M F S P Y S S P M M A V 108
325 GAC AAA TTC CCG ACA AAT CAA TTG CCT CAA ACA ATA GCT CAT TCA ACG GCT TTG
   D K F P T N Q L P Q T I A H S T A L 126
379 TCC GAC GCA CCA ATG TAT TCC AAA ATA AAC GGA GCA GCA GCA GCG TTT CAT CAC
   S A D P M Y S K I N G A A F H H 144
433 TCC GTT TCG CCA GGA TAT CCA GTC ATT TAC CCA AAT GTA ACC GCA GTT AAC AGC
   S V S P G Y P V I Y P N V T A V N S 162
487 CAC CAC TCC GTT ACA CAG CCA TCG CGT CAG ATT TTC ACT GGT TCT TTA GAT TCC
   H H S V T Q P S R Q I F T G S L D S 180
541 TCG CAC TCA TTT CGC GCT GCC GAT GTG ATG AAT CAC AAC CGA GCA TTG TAC ACC
   S H S F R A A D V M N H N R A L Y T 198
595 AGT CAA GCA TTT CAA CCC ACC TTA CCC TCA CAA ATC CAG CAA AGA ATT TCA AGC
   S Q A F Q P T L P S Q I Q Q R I S S 216
649 GTT GAT GAA CCA CGA GGA GGA TCG TTG ACA AAC GGC TCA CCC AGC CCA ACC GCA
   V D E P R G G S L T N G S P S P T A 234
703 TCG AGC AGC GAA GCA CCA AGC AAA TCA ACC GCA GGG TAC ACA GTG TCA ACG GCA
   S S S E A P S K S T A G Y T V S T A 252
757 GAG CTT AGC GCT CAG CAG AGA GTT TGG CAC CTC GTG CC 794bp
   E L S A A Q R V W H L V 264aa

```

B

```

AmSoxBa 1 .....
NvSoxB2 1 .....
CeSoxB2 1 .....
DmSoxB2.1 1 .....
DmSoxB2.2 1 .....
DmSoxB2.3 1 .....
SpSoxB2 1 .....
ClSoxB2 1 .....
MmSoxB2 1 .....
GgSoxB2 1 .....
GgSoxB2.1 1 .....
DfSoxB2.1 1 .....

AmSoxBa 1 .....
NvSoxB2 1 .....
CeSoxB2 1 .....
DmSoxB2.1 1 .....
DmSoxB2.2 91 .....
DmSoxB2.3 1 .....
SpSoxB2 1 .....
ClSoxB2 1 .....
MmSoxB2 1 .....
GgSoxB2 1 .....
GgSoxB2.1 1 .....
DfSoxB2.1 1 .....

AmSoxBa 1 .....
NvSoxB2 1 .....
CeSoxB2 1 .....
DmSoxB2.1 75 .....
DmSoxB2.2 181 .....
DmSoxB2.3 54 .....
SpSoxB2 1 .....
ClSoxB2 1 .....
MmSoxB2 1 .....
GgSoxB2 1 .....
GgSoxB2.1 1 .....
DfSoxB2.1 1 .....

AmSoxBa 32 .....
NvSoxB2 32 .....
CeSoxB2 71 .....
DmSoxB2.1 165 .....
DmSoxB2.2 271 .....
DmSoxB2.3 144 .....
SpSoxB2 37 .....
ClSoxB2 35 .....
MmSoxB2 31 .....
GgSoxB2 31 .....
GgSoxB2.1 31 .....
DfSoxB2.1 31 .....

AmSoxBa 121 .....
NvSoxB2 121 .....
CeSoxB2 128 .....
DmSoxB2.1 245 .....
DmSoxB2.2 358 .....
DmSoxB2.3 232 .....
SpSoxB2 123 .....
ClSoxB2 124 .....
MmSoxB2 110 .....
GgSoxB2 110 .....
GgSoxB2.1 119 .....
DfSoxB2.1 111 .....

AmSoxBa 194 .....
NvSoxB2 192 .....
CeSoxB2 199 .....
DmSoxB2.1 315 .....
DmSoxB2.2 437 .....
DmSoxB2.3 313 .....
SpSoxB2 199 .....
ClSoxB2 213 .....
MmSoxB2 176 .....
GgSoxB2 176 .....
GgSoxB2.1 209 .....
DfSoxB2.1 174 .....

AmSoxBa .....
NvSoxB2 .....
CeSoxB2 .....
DmSoxB2.1 .....
DmSoxB2.2 527 .....
DmSoxB2.3 .....
SpSoxB2 .....
ClSoxB2 .....
MmSoxB2 .....
GgSoxB2 .....
GgSoxB2.1 .....
DfSoxB2.1 .....

AmSoxBa .....
NvSoxB2 .....
CeSoxB2 .....
DmSoxB2.1 .....
DmSoxB2.2 .....
DmSoxB2.3 .....
SpSoxB2 .....
ClSoxB2 .....
MmSoxB2 .....
GgSoxB2 .....
GgSoxB2.1 .....
DfSoxB2.1 .....

```
