# Supplementary material for: Sox genes in the coral Acropora millepora: divergent expression patterns reflect differences in developmental mechanisms within the Anthozoa
Source: PubMed Central journal article supplement (PMC2613919; doi:10.1186/1471-2148-8-311), 2008-11-12
Supplement: 1471-2148-8-311-S3.pdf [file 1471-2148-8-311-S3.pdf]

A

1 CAC GAG CAA GGT TAG CTA TTC AGT CGC GAG TCG GGT TTT ACA AAG AGG TCG AGT  
 57 AGC TGC GAC AAA CTA AAC ATG AGC GGC AAA GAT CCA GAT CAC ATT AAG AGG CCT  
 M S G K D P **D H I K R P** 12  
 111 ATG AAC GCT TTC ATG GTA TGG TCC AAA GAG AAA CGC AGA ACA ATG TCG CAA AAG  
**M N A F M V W S K E K R R T M S Q K** 30  
 165 AAC CCG AAG ATG CAC AAT TCT GAA ATC AGC AAA ATT TTG GGA GCG CAA TGG AAA  
**N P K M H N S E I S K I L G A Q W K** 48  
 219 AAA ATG CCC GAC GAG GAA AAG GCA AAA TAC ATT GAG GAA GCC AAG GCA CTG CAA  
**K M P D E E K A K Y I E E A K R L Q** 66  
 273 CAA GAA CAC AGT CAA AAA CAT CCC GAT TAC AAA TAC AAG CCG CGA CGC AAG AAG  
**Q E H S Q K H P D Y K Y K P R R R K** 84  
 327 CAG AAA CAA CTT ATA AAG AAG GCG ACT TAT TCG TCC CCT TAC ACG GAG ACG GAG  
**Q K Q L I K K A T Y S F P Y T G T E** 102  
 381 AAC GCG GCT CAC GCC GCG GCA GCA ATG AAG CTT TCG GCG TAC CCT CCA TCG ATG  
 N A A H A A A A M K L S A Y P P S M 120  
 435 GCG CCT GAT TCT ATG CAC TAT CAA CAG TAT TAT CAA ATG TCT CAA CAC GCT CCG  
 1353 TTT GTT TAT GAC AAA AAC AGC TGA TTT AAG TGT TAT CGC TCC **AAT AAA** AGC ATG  
 A P D S M H Y Q Q Y Y Q M S Q H A P 138  
 1407 AAT ATT CTG TTA AAA AAA TTA AAA AAA AAA AAA AA  
 489 TAT CCA ACT ATG TAC GAC ATG GCA GCC GTT CAC GCT CAA AGA CAA ACG CAT AGT  
 Y P T M Y D M A A V H A Q R Q T H S 156

543 TTT TCG ACG CCA CCA AGC CAC GCT AAT AGC GTG CAC GAA TTA CCT TAC CCG GTG  
 F S T P P S H A N S V H E L P Y P V 174  
 597 CGT CCC AGC GAA ATG ATG ATT CCT ACA CCA ACT GGA CCA CAC GGC CAT CCG AGC  
 R P S E M M I P T P T G P H G H P S 192  
 651 CAC ATT TAC GGT TCA ACT ATG GAG TCA GGA CCT ACG ACA AGC GGT GTA TCG GCC  
 H I Y G S T M E S G P T T S G V S A 210  
 705 TTT ACA AAC GCG ACA CAG AAC ATT CAT GCT CAA CAA ATC GCC GAG GCA AGT CCA  
 F T N A T Q N I H A Q Q I A E A S P 228  
 759 CAG TAT CCT CAA CTC TAC ACT CAA CCG CAC GTA TAG TTC TGA CTG ACT TGT GTA  
 Q Y P Q L Y T Q R H V \* 239  
 813 TCT AAC GGT ACA AAG GAA GCT TAT CTT TAC AAT CCG TAT GTC AAA TAG AAA TAT  
 867 CTA CCT GCA TTT GAC ATT TCA ATG AAC TAG CTG ACT GCG TAT TTA CTT TTT TTC  
 921 TGA AGA ACT TTG TAA ACA CTT GAT ACT CTG GCA TTA TTC TCA CTA AGT GAT ACT  
 975 TTT CAC GAT CTC TTT TAT CGC GTC TTG AGC GAA TTT CTG GGC GTT ATC CTG GTT  
 1029 TAT TGA TTA GCA AAT ATT GGA GTT ATA GAA AAG ATA ACA AAT TGA ATA ACG CCT  
 1083 CCG ACC GCT TCT ATT CAA TTC AGA CAG AAG ATT ATA TTT TGA TCA CAA ACT GAT  
 1137 TTG ACG CTT GCA CAT TTT AAG CAA ACT CGA CGT TGA TGA TCG AGA AGG TTA CGC  
 1191 TTT ATT TCC CTA TTT ATT CAG CAT TTC GCA CCT CGC GTC AAG ATG CCG AAT AAG  
 1245 ATC CTC TGT CGT TTT TTG GCA GTT GAA TCA AGT TTT TCA AGT TAT TGT AAA TTT  
 1299 TAC TGC GAA CCA CTT GCA CCG CTG CCG TTA ATC ATG TTA GAG TGA AAA TTG GAT  
 1353 TTT GTT TAT GAC AAA AAC AGC TGA TTT AAG TGT TAT CGC TCC **AAT AAA** AGC ATG  
 1407 AAT ATT CTG TTA AAA AAA TTA AAA AAA AAA AAA AA

B

AmSoxBb 1  
 NvSox3 1  
 CeSoxB2 1  
 DmSoxB2.1 1  
 DmSoxB2.2 1  
 DmSoxB2.3 1  
 SpSoxB2 1  
 ClSoxB2 1  
 MmSox14 1  
 GgSox14 1  
 GgSox21 1  
 DfSox21 1  
 AmSoxBb 1  
 NvSox3 1  
 CeSoxB2 1  
 DmSoxB2.1 1  
 DmSoxB2.2 91  
 DmSoxB2.3 1  
 SpSoxB2 1  
 ClSoxB2 1  
 MmSox14 1  
 GgSox14 1  
 GgSox21 1  
 DfSox21 1  
 AmSoxBb 1  
 NvSox3 1  
 CeSoxB2 44  
 DmSoxB2.1 35  
 DmSoxB2.2 181  
 DmSoxB2.3 54  
 SpSoxB2 1  
 ClSoxB2 1  
 MmSox14 1  
 GgSox14 1  
 GgSox21 1  
 DfSox21 1  
 AmSoxBb 32  
 NvSox3 32  
 CeSoxB2 71  
 DmSoxB2.1 165  
 DmSoxB2.2 271  
 DmSoxB2.3 144  
 SpSoxB2 37  
 ClSoxB2 35  
 MmSox14 31  
 GgSox14 31  
 GgSox21 31  
 DfSox21 31  
 HMG domain group B motif  
 AmSoxBb 119  
 NvSox3 117  
 CeSoxB2 128  
 DmSoxB2.1 252  
 DmSoxB2.2 358  
 DmSoxB2.3 227  
 SpSoxB2 123  
 ClSoxB2 124  
 MmSox14 110  
 GgSox14 110  
 GgSox21 111  
 DfSox21 111  
 AmSoxBb 197  
 NvSox3 186  
 CeSoxB2 190  
 DmSoxB2.1 312  
 DmSoxB2.2 431  
 DmSoxB2.3 302  
 SpSoxB2 196  
 ClSoxB2 214  
 MmSox14 176  
 GgSox14 176  
 GgSox21 206  
 DfSox21 174  
 AmSoxBb 232  
 NvSox3 232  
 CeSoxB2 232  
 DmSoxB2.1 521  
 DmSoxB2.2 521  
 DmSoxB2.3 348  
 SpSoxB2 242  
 ClSoxB2 304  
 MmSox14 212  
 GgSox14 212  
 GgSox21 252  
 DfSox21 212
