# Supplementary material for: Sox genes in the coral Acropora millepora: divergent expression patterns reflect differences in developmental mechanisms within the Anthozoa
Source: PubMed Central journal article supplement (PMC2613919; doi:10.1186/1471-2148-8-311), 2008-11-12
Supplement: 1471-2148-8-311-S6.pdf [file 1471-2148-8-311-S6.pdf]

A

1 GCA CGA GGG AAC ACA TCA GCG GGT GTT TTG GCC GTC GGA TAT TTT TCG CCG AAG  
57 AAA TTT CAT TTC GAG ACA AGT TGG TTG CCG ACT CGA AGT CTC CGA GTC ATG CAT  
M H 2

111 GAG GTT GAC GCT ATG CTC CTA TCC GAT GCG AGG ACA GAG CGA AAC AAG AGA GTC  
E V D R M L L S D R R T E R N K R V 20

165 CCA GCA CCT GCT TCT TCG ATG CGA GTT TTA AGC CCC TCG GGG TTT AAC AAT TCC  
P A P L S S M R V L S P S G F N N S 38

219 ATC GGT TGT CAC TCA GCT CAG CCA GAG AAC CAA AGC TAC GTC AAG CTA CTT  
I G C H S V Q P E Q N Q S Y V K L L 56

273 GCG GGG TCG CAA GAG CAA GAC AGC AAC CCG AAG AAA GAG CTT AGC ATG GAC AGC  
R G S Q E Q D S N P K K E L S M D S 74

327 GAC ACT GAT AGA ATT AAA AGA CCC ATG AAC GCT TTT ATG GTG GGC CAA GTT  
D T **DR I K R P M N A F M V W A Q V** 92

381 GAG CGA AGA CGA CTG GCT GAC GCG AAC CCA GAA CTT CAC AAC GCA GAA CTT AGT  
**E R R R L A D A N P E L H N A E L S** 110

435 AAA ATC CTT GGG CAA GCT TGG AGA GCG TTT AAC GGT TTG CAG AAA AGA CCA TTC  
**K I L G Q A W R A L N G L Q K R P F** 128

489 GTT GAA GAG GCC GAA CCG TTG CGA CAA CAC ATC AAA GAT CAC CCT GAC TAT  
**V E E A E R L R Q Q H I K D H P D Y** 146

543 AAA TAT CCG CCG CGG CGA AGA AAA CAT CCT AAA AGG GTG ATA AAA AAG ATG TCA  
**K Y R P R R R K H** P K R V I K K M S 164

597 TCT ACC AAT CCA GCG GTC TGT GCC TTG CTA GAG CGC AAA GAC GCA TCC CTT  
S T N P A V C A L V Q E R K D A S P 182

651 GCG GTC TCT CGA TTG AAT CCA ACA ACT GAC TGT GGA CCG CTC CCG TTC AAC CTT  
R V S R L N P T T D C G R L P F N P 200

705 TCA GAT GAA AAT CCG ATA GGT TTT GCG CCT CTC CCG AAG CAG CCG GAA TTT CCT  
S D G N P I G F A P L P K Q T G F P 218

759 AGT GGA GAA ATG AAA CTT TCG CAT CTT GGA AGT CCG CCT GTT TTG CCC AAG TTG  
S G E M K L S H L G S P P V L P K L 236

813 CCC GAG ATA AGT CTC CTC ACA CCC GAG CCA AGT CCT GGT TCA AGC GAG TTT GGC  
P E I S L L T P E P S P G S S E F G 254

867 AGC GAG TTC AAT TTT CCA AGC GCG TGG CAA GAC CTG CCT AAC GCG CCG GTA AAT  
S E F N F P S G W Q D L P N A P V N 272

921 CTA CAA CCC AAA ACC TTG CAA TCA ACC TCG CCA GCG TCG TAC GCT GGT GTA TCC  
L Q P K T L Q S T S P A S Y V G V S 290

975 ACC GCA AAT TCG ACG CTT GCC AGC CAG CTC TAT TTC TCG AAC GGA AGT GTA AAT  
T A N S T L A S Q L Y F S N G S V N 308

1029 GCA ATG ACA TTG AAC CCA TCG ATC GCT GGC AGC GTG AAT GCA GCT CAC CTG CAG  
A M T L N P S I A G S V N A A H L Q 326

1083 AAC AGC GTT GCA AGT TCA AGC CAA CTT TTC TCG TCT TTT CAC ATC ACA GAA TTA  
N S V A S S S Q L F S S F H I T E L 344

1137 ATA CCC GAG GAG GAT TTC AAC CGA GAG GAG TTT GAT CAA TAC CTT GAT GGG ACA  
I P E E D F N R E E F D Q Y L D G T 362

1191 GAA ACG GCG AAC ATT TCT TGG ATG TAA GCT GCT GGA ATG ACA GCT TGG AAA CGA  
E T A N I S W M \* 370

1245 GAA TGA ACT CCG TCG TAA TCG CAG AAG CAA ATC TTT TAG GTG CGA TCA AGA CAT  
1299 TTA GTC AAT ATT ATC ATG CGA CCG ATT TAG TAC ATC GTC AAG ATC GTT GCA AGC  
1353 GAA CAT TTC TCT TGT CAT CAT AGT ATT AGT TTG TCC AAA TAT TTT CAT CCG CCA  
1407 TCG GTA CCG TTT CTA TTT TCT CCG TGT ACA GTT TAC ATA TCG CAG AGG TCA  
1461 AAC GCT TGG GCT GTA CAG AGT TAA AAG CTT AAA GTC TCG AAG GAG CCG CCA GTC  
1515 GTT TCA AAT TCC GTT TCT TAA ACT ACT CCG GTA TAC ATT GCT ATA GTT TAT  
1569 ATT TTG ATG TAA ATT TAT TGT GGT TCG CTA TCG **AAA TAA** GAA TTT TGT AAT GAA  
1623 AAA AAA AAA AAA A A

B

AmSoxF 1 -----HVEVDRMLLSDRRTER  
NvSoxF1 1 -----HVEVDRMLLSDRRTER  
DmSoxF 1 MPEFYDHEPHERLLNNSKYPVHSTPTREYSHSQGDYVPEHGGLYTDQRLMHEHNSDAGIHYVRGQHEHSSPDEHPAIGQSSYENHSL  
CfSoxF 1 -----MTGLLHVVPNNAGSGLTPYTPISDEYSRSLTSPVDFPSSFGVSPQDYLESMLGLTRAVSGSSPSSKSVTSPSTFTAGNLNGL  
XfSoxF1a 1 -----HVEVDRMLLSDRRTER  
HsSox17 1 -----HVEVDRMLLSDRRTER  
HsSox7 1 -----HVEVDRMLLSDRRTER  
MmSoxF 1 -----HVEVDRMLLSDRRTER  
FrSox18 1 -----HVEVDRMLLSDRRTER

AmSoxF 17 NKRQPAIPISQVPLSPSGPNNLCHSVQPOQSYVKLLRSGSQDQSNP  
NvSoxF1 17 AGRFRVHLPPIITFNATPTQAAMRDDLPIYNLWLSLSSGSEGRARTEK  
DmSoxF 91 NQADLAHSHSHSPMPMVSATVGGTASGLININPLLGGGQVNLKFLSHPHAGVGGGTGQMDCTSHSPFAAASMSWYDYKGL  
CfSoxF 87 FYSYVTVYESTYSYSSQWEGPQVYWAHQYQYACVYNTMWSQSLAYWDTQYLSVPELADITW  
XfSoxF1a 17 KCSPIIMMGLGQCOVAEMTSLSEBGLKSDAGS  
HsSox17 17 QSAFVAVMAGLGCPCWAEHSLSLDPMKVKGAPANSQAPAGAARA  
HsSox7 1 -----MAGLQAYFWTEGLECPALDARELSGGSPFAVFRPGDK  
MmSoxF 1 -----MAGLQAYFWTEGLECPALDARELSGGSPFAVFRPGDK  
FrSox18 10 RETELHGARLSLQFPWASRTPSPASDSDMGPEQLSDDSSSPVRRTEPRISLTGGG

AmSoxF 67 -----KKELMSDSDTRKKPFNMFVMAVQSRRLADAPPELLNALSSEKLGQAWRALNGIQRRPFVEEABE  
NvSoxF1 67 -----DDETEKRPMAFMVMAVQSRRLADAPPELLNALSSEKLGQAWRALNGIQRRPFVEEABE  
DmSoxF 181 CAPNCGYLHRKPLPADLKYRPGGTQSKSAKSRHDPNMAFMVMAKSEKELADEPELLNALSSEKLGQAWRALNGIQRRPFVEEABE  
CfSoxF 159 -----NVSRSRSTETAKAKKDEPRHDPNMAFMVMAKSEKELADEPELLNALSSEKLGQAWRALNGIQRRPFVEEABE  
XfSoxF1a 56 -----KARHDPNMAFMVMAKSEKELADEPELLNALSSEKLGQAWRALNGIQRRPFVEEABE  
HsSox17 63 -----KESRDPNMAFMVMAKSEKELADEPELLNALSSEKLGQAWRALNGIQRRPFVEEABE  
HsSox7 40 -----GSESRDPNMAFMVMAKSEKELADEPELLNALSSEKLGQAWRALNGIQRRPFVEEABE  
MmSoxF 40 -----GSESRDPNMAFMVMAKSEKELADEPELLNALSSEKLGQAWRALNGIQRRPFVEEABE  
FrSox18 67 -----QSFAMSTGVGPPSDGKAAGGSRHDPNMAFMVMAKSEKELADEPELLNALSSEKLGQAWRALNGIQRRPFVEEABE

HMG domain

AmSoxF 135 **QVQVHGHQHPNPKYRPRRRKQKRAK**STNPAVALQVQRKADSPVSRLENLPTDQGLPFPNSDQ  
NvSoxF1 129 **LQVQHGHQHPNPKYRPRRRKQKRAK**STGAAAGSKVNGTACEKSSGQVTRSRNCLVESGFQVQV  
DmSoxF 271 **LQVQHGHQHPNPKYRPRRRKQKRAK**QVQKQKQESSESNPPTGGKSNPLATPPLATASSTYTPDSTCNTQHQHQSPTGGLYE  
CfSoxF 236 **LQVQHGHQHPNPKYRPRRRKQKRAK**QVQKQKQESSESNPPTGGKSNPLATPPLATASSTYTPDSTCNTQHQHQSPTGGLYE  
XfSoxF1a 117 **LQVQHGHQHPNPKYRPRRRKQKRAK**RANENGFMMHMAQESAVLADG-RMCLNFSSGLYHQYTHQ-- --VQPSSHYRFPQ-AVAP-  
HsSox17 124 **LQVQHGHQHPNPKYRPRRRKQKRAK**RVRVGGFLHGLAEPQAAALGPEQGRVAMDGLQGFQGGFPAQGLPFPNMGHGHYDCQSLGAP-  
HsSox7 101 **LQVQHGHQHPNPKYRPRRRKQKRAK**RVDFGLLSSLSRDNALPKRSRSGRGLGKERDEYSPOTALFLRGGCYNRQPAAGGGG--  
MmSoxF 101 **LQVQHGHQHPNPKYRPRRRKQKRAK**RVDFGLLSSLSRDNALPKRSRSGRGLGKERDEYSPOTALFLRGGCYNRQPAAGGGG--  
FrSox18 147 **LQVQHGHQHPNPKYRPRRRKQKRAK**RVRVGGFLHGLAEPQAAALGPEQGRVAMDGLQGFQGGFPAQGLPFPNMGHGHYDCQSLGAP-

AmSoxF 204 -----NPIGFAPKQKTFPSPGEMKLSHSGSPVLPKLPIS  
NvSoxF1 197 -----TNSPIGFAPKQKTFPSPGEMKLSHSGSPVLPKLPIS  
DmSoxF 361 QPLKPTYSPPSVOCVSADSTQIESLANCPALLNESSPGGGVNDMLLKKITPSSRAKSRQKLAQRNNSRSHGKNGGSGF  
CfSoxF 304 -----LYSNLSPSSDQAVRNRHNSRSHGKNGGSGF  
XfSoxF1a 200 -----HYGQSYLQKSSSPLDAAE--DPVFTSPADCGG  
HsSox17 213 -----EIQGFLPQKTSPLDQVDP--DPAFAAPMGCT  
HsSox7 189 -----GTPSSVDYTPYGLPPEMSPDLVLEP--EQFFSSPCDQCC  
MmSoxF 185 -----SVDTYTPYGLPPEMSPDLALAP--EQFFSSPCDQCC  
FrSox18 237 Q-----AVPQHLESYGLPPEMSPDLLEAGAGSVPFPQHQHCGAG

AmSoxF 241 LLTPEPSPGSEHGGENFPSSQWDLNPHLHLPKTLQSTGASVQVSTANSTASLQSLVPSGVM-----AMTLNPSIAQSVNAA  
NvSoxF1 234 DIDLPEPSPGSEHGGENFPSSQWDLNPHLHLPKTLQSTGASVQVSTANSTASLQSLVPSGVM-----SIVNAGASTGP  
DmSoxF 451 IYAATYPLAPTSVAVVAARGMYVTCNRRLEDDHSHVKGTFYVPSVSEEDNSTEMNSIALQOHCN-----VVTSPSSGDTMPT  
CfSoxF 338 SNSPSPDSTASQVSLLELFSHTNPSSTQIKHSGPGRMRKLFDSQTSKCDNFSDQATNRRN-----QSLNFMNTTVSS  
XfSoxF1a 234 MFPYSYNGSVPHQNSMLVQWQPTQMS-----VQVMSYVQCMACQSPHNYGOWLIRN-----HGLHQVQSPFP  
HsSox17 247 AAGYSYQVSDSAGPPEPAGPMPHRLGPEPAGSPGLLQPSALHVVYVQAMGSGAGGGRFQOMQHQHQHQHQHPGPPQSPFP  
HsSox7 230 HPRKIPHLPGHPSPETAPSPALRCHSPFLGSHLAGQS-----GVMSMSPVGCPPSPAYSPATYH-----LHSLQALQLSFP  
MmSoxF 222 HPHLIPHLPGHPSPETAPSPALRCHSPFLGSHLAGQS-----GVMSMSPVGCPPSPAYSHATYH-----LHSLQALQLSFP  
FrSox18 281 MVGNSYHQHQHGHNHQVQAPLESSTSSVPSHLPASLPQAKQCCGSHHSAAPAGVSYASSTPM-----STYMSCHQLSFP

AmSoxF 324 HLQNSVASSS-----QLFSSPHILPEEDFNHDFDQYDGTETANISW-----  
NvSoxF1 313 QQSFP-----LGDLLDDLNLTNDFDQYDGTETALDAPYVI-----  
DmSoxF 534 SMSYTVSMADCGNLRISMELSGNVLPSANAYQWYDFLRQNDGDTSAVHEKHTSSQASQCLKYIPDYNQYDDVEAA  
CfSoxF 420 PQIRM-----PIDFCFTKYTAPSTNRYDFTATVTCQSTGLEP-----  
XfSoxF1a 305 PEAQMGSR-----ADHIQPADMLAEVDFDQYSSVAKSDLGMRY-----HAQBSVVP  
HsSox17 337 PEALCRDQ-----TDPQPAELLQVDFDQYHVPCKEMGLPY-----QOEDGQVNL  
HsSox7 307 PEPFG-----FDALDQLQVLELQMDDFDQYNTFGHPDSATGAMALSHVVP-----VSQVTP  
MmSoxF 299 PEPFG-----FDLQDQLQVLELQMDDFDQYNTFGHPDSAAQVGTGHVFP-----LSQGTPT  
FrSox18 364 PTFPSSCSSSSIQSTFPNSIPELHNPETTHLNSGGEPWQVDFDQYVHAGRIREALGRGVNLKGPSGROSSVMSAAFPSC

AmSoxF -----  
NvSoxF1 -----  
DmSoxF 624 YSNAMLPATAASYTQLPYPTSLAAFLQLAVFPQQTSGAYGAQPIQSGYLHYGNYGGYEGMARVSHRTRKRPSTISHPRLRPPCC  
CfSoxF -----  
XfSoxF1a 356 AD-NGRISVLSQASTAVVYQVPSA-----  
HsSox17 389 PDSHGAISVVSDASSAVYCNPDV-----  
HsSox7 364 GFTSTLISVLAADATYNSYSV-----  
HsSox7 356 GFTSTLISVLAADATYNSYSV-----  
FrSox18 454 DGGSSLLSALSADASSAVYNTCTIG-----

AmSoxF -----  
NvSoxF1 -----  
DmSoxF 714 HPTRR-----  
CfSoxF -----  
XfSoxF1a -----  
HsSox17 -----  
HsSox7 -----  
MmSoxF -----  
FrSox18 -----
