# Supplementary material for: Sox genes in the coral Acropora millepora: divergent expression patterns reflect differences in developmental mechanisms within the Anthozoa
Source: PubMed Central journal article supplement (PMC2613919; doi:10.1186/1471-2148-8-311), 2008-11-12
Supplement: 1471-2148-8-311-S7.pdf [file 1471-2148-8-311-S7.pdf]

|            |   |   |   |   |   |   |   |   |   |   |   |   |   |   |   |   |   |   |   |   |   |   |   |   |   |   |   |   |   |   |   |   |   |   |   |   |   |   |   |   |   |   |   |   |   |   |   |   |   |   |   |   |   |   |   |   |   |   |   |   |   |   |   |   |   |   |   |   |   |   |   |   |   |   |   |   |   |   |   |
|------------|---|---|---|---|---|---|---|---|---|---|---|---|---|---|---|---|---|---|---|---|---|---|---|---|---|---|---|---|---|---|---|---|---|---|---|---|---|---|---|---|---|---|---|---|---|---|---|---|---|---|---|---|---|---|---|---|---|---|---|---|---|---|---|---|---|---|---|---|---|---|---|---|---|---|---|---|---|---|---|
| AmSoxB1    | D | R | V | K | R | P | M | N | A | F | M | V | S | R | E | R | R | R | M | A | Q | E | N | P | K | M | H | N | S | E | I | S | K | R | L | G | A | E | W | K | Q | L | S | D | P | E | K | R | P | Y | V | D | E | A | K | R | L | R | A | V | H | M | K | D | H | P | D | Y | K | Y | R | P | - | R | R | K | S | K |   |
| NvSoxB1    | D | R | V | K | R | P | M | N | A | F | M | V | S | R | E | R | R | R | K | M | A | Q | D | N | P | K | M | H | N | S | E | I | S | K | R | L | G | S | E | W | K | L | L | S | E | Q | E | K | R | P | Y | I | D | E | A | R | R | L | R | A | V | H | M | K | E | H | P | D | Y | K | Y | R | P | - | R | R | K | S | K |
| NvSox1     | E | H | V | K | R | P | M | N | A | F | M | V | S | R | E | E | R | R | K | I | A | Q | E | N | P | K | M | H | N | S | E | I | S | K | R | L | G | S | E | W | K | Q | L | A | D | D | D | K | P | F | V | E | E | A | K | K | L | R | A | Q | H | M | K | E | H | P | D | Y | K | Y | R | P | - | R | R | M | P | K |   |
| AmSoxBa    | G | H | I | K | R | P | M | N | A | F | M | V | S | R | G | K | R | K | Q | Y | A | A | I | N | P | R | M | H | N | S | E | I | S | K | R | L | G | A | E | W | K | M | L | S | Q | D | E | K | E | P | F | V | A | E | A | K | R | L | Q | A | I | H | I | Q | E | H | P | D | Y | K | Y | K | P | K | R | R | K | P | K |
| NvSoxB2    | G | H | V | K | R | P | M | N | A | F | M | V | S | R | G | K | R | K | H | Y | A | S | I | N | P | R | M | H | N | S | E | I | S | K | R | L | G | A | E | W | K | M | L | T | A | E | E | K | E | P | F | I | A | E | A | K | R | L | Q | A | L | H | I | Q | E | H | P | D | Y | K | Y | K | P | K | R | R | K | P | K |
| NvSox2     | D | H | I | K | R | P | M | N | A | Y | M | V | S | R | K | E | R | R | R | I | A | E | E | C | P | R | M | L | N | S | E | I | S | K | R | L | G | L | E | W | N | S | L | T | L | D | E | K | Q | P | Y | V | E | E | A | K | R | L | R | E | L | H | K | K | D | H | P | D | Y | K | Y | Q | P | - | K | R | K | P | K |
| AmSoxBb    | D | H | I | K | R | P | M | N | A | F | M | V | S | K | E | K | R | R | T | M | S | Q | K | N | P | K | M | H | N | S | E | I | S | K | I | L | G | A | Q | W | K | K | M | P | D | E | E | K | A | K | Y | I | E | E | A | K | R | L | Q | Q | E | H | S | Q | K | H | P | D | Y | K | Y | K | P | R | R | R | K | Q | K |
| NvSox3     | N | H | V | K | R | P | M | N | A | F | M | V | S | K | E | R | R | R | I | K | S | Q | E | C | P | R | M | H | N | S | E | I | S | K | I | L | G | C | E | W | K | A | T | K | D | E | L | K | Q | P | Y | I | E | K | A | K | E | L | Q | A | Q | H | S | R | E | N | P | G | Y | K | Y | K | P | R | R | R | K | P | K |
| AmqSoxB1   | D | K | V | K | R | P | M | N | A | F | M | V | S | R | K | M | R | K | K | I | A | D | E | N | P | K | M | H | N | S | E | I | S | K | R | L | G | T | Q | W | K | A | L | S | E | D | K | R | P | F | I | D | E | A | K | R | L | R | E | A | H | M | K | K | H | P | N | Y | K | Y | K | P | - | K | R | K | K | Q |   |
| AmqSoxB2   | D | H | I | K | R | P | M | N | A | F | M | V | S | K | E | R | R | K | E | L | A | Q | E | N | P | R | M | H | N | S | E | L | S | K | K | L | G | A | E | W | K | A | L | S | D | T | N | K | H | R | Y | I | E | E | A | K | K | I | R | E | Q | H | M | A | E | F | P | H | Y | R | Y | R | P | - | R | R | K | P | K |
| DmSoxB1    | D | R | V | K | R | P | M | N | A | F | M | V | S | R | G | Q | R | R | K | M | A | S | D | N | P | K | M | H | N | S | E | I | S | K | R | L | G | A | Q | W | K | D | L | S | E | S | E | K | R | P | F | I | D | E | A | K | R | L | R | A | V | H | M | K | E | H | P | D | Y | K | Y | R | P | - | R | R | K | T | K |
| CeSoxB1    | D | R | V | K | R | P | M | N | A | F | M | V | S | R | G | Q | R | K | K | M | A | L | E | N | P | K | M | H | N | S | E | I | S | K | R | L | G | T | E | W | K | M | L | S | E | Q | E | K | R | P | F | I | D | E | A | K | R | L | R | A | I | H | M | K | E | H | P | D | Y | K | Y | R | P | - | R | R | K | T | K |
| MmSox2     | D | R | V | K | R | P | M | N | A | F | M | V | S | R | G | Q | R | R | K | M | A | Q | E | N | P | K | M | H | N | S | E | I | S | K | R | L | G | A | E | W | K | L | L | S | E | T | E | K | R | P | F | I | D | E | A | K | R | L | R | A | L | H | M | K | E | H | P | D | Y | K | Y | R | P | - | R | R | K | T | K |
| DmSoxB2 .1 | G | H | I | K | R | P | M | N | A | F | M | V | S | R | L | Q | R | R | Q | I | A | K | D | N | P | K | M | H | N | S | E | I | S | K | R | L | G | A | E | W | K | L | L | A | E | S | E | K | R | P | F | I | D | E | A | K | R | L | R | A | L | H | M | K | E | H | P | D | Y | K | Y | R | P | - | R | R | K | P | K |
| CeSoxB2    | D | H | V | K | R | P | M | N | A | F | M | V | S | R | G | Q | R | R | K | M | A | Q | D | N | P | K | M | H | N | S | E | I | S | K | R | L | G | A | E | W | K | Q | L | S | E | Q | E | K | R | P | F | I | D | E | A | K | R | L | R | A | L | H | M | K | E | H | P | D | Y | K | Y | R | P | - | R | R | K | P | K |
| MmSox14    | D | H | I | K | R | P | M | N | A | F | M | V | S | R | G | Q | R | R | K | M | A | Q | E | N | P | K | M | H | N | S | E | I | S | K | R | L | G | A | E | W | K | L | L | S | E | A | E | K | R | P | Y | I | D | E | A | K | R | L | R | A | Q | H | M | K | E | H | P | D | Y | K | Y | R | P | - | R | R | K | P | K |

\*
