# Supplementary material for: Sox genes in the coral Acropora millepora: divergent expression patterns reflect differences in developmental mechanisms within the Anthozoa
Source: BMC Evol Biol. 2008 Nov 12;8:311. doi: 10.1186/1471-2148-8-311 (PMC2613919; doi:10.1186/1471-2148-8-311)
Supplement: Additional file 5 — Sequence analysis of AmSoxE1. (A) The nucleotide sequence and deduced amino acid sequence of the AmSoxE1 cDNA. AmSoxE1 cDNA contains a 1974 bp insert and an open reading frame (ORF) of 1224 bp, corresponding to 408 amino acids. An asterisk indicates the stop codon. The 79 amino acids of HMG box sequence are shaded in red. Numbers on the left side represent the nucleotide sequence; numbers on right side represent the amino acid sequence. Putative polyadenylation sites are underlined. (B) Boxshade alignment of AmSoxE1 and other group E Sox genes. The HMG domain is underlined in red. Asterisks indicate the key residues of group E. The highly conserved regions of group E (i, ii and iii) are underlined. The species names are abbreviated as follows; Am, coral, Acropora millepora; Ci, ascidian, Ciona intestinalis; Dm, fruit-fly, Drosophila melanogaster; Dr, zebrafish, Danio rerio; Fr, Japanese pufferfish, Fugu rubripes; Hs, human, Homo sapiens; Mm, mouse, Mus musculus; Nv, sea anemone, Nematostella vectensis. [file 1471-2148-8-311-S5.pdf]

|     |                                                                                                                                                    |     |      |                                                                                                                                                                                                                                                                                                                                                                                                                                                                                                                                                                                                                                                                                                                                                                                                                                                                                                                                                                                                                                        |     |
|-----|----------------------------------------------------------------------------------------------------------------------------------------------------|-----|------|----------------------------------------------------------------------------------------------------------------------------------------------------------------------------------------------------------------------------------------------------------------------------------------------------------------------------------------------------------------------------------------------------------------------------------------------------------------------------------------------------------------------------------------------------------------------------------------------------------------------------------------------------------------------------------------------------------------------------------------------------------------------------------------------------------------------------------------------------------------------------------------------------------------------------------------------------------------------------------------------------------------------------------------|-----|
| 57  | GGC ACG AGG CGA AGT TCG ATT TTT TCG ATT CCA GGG AAA ACT TCT GAA ATT AGT<br>AGA CAT AAA ATG AAG GAA GGC ACG AAG CAC GGC AAA ACT TCG AAG ACT GAT GAC | 15  | 579  | CCA CTC AAG AAA TCA GAA AAT AGC ACT GTT CCT TCT AGC ACA AAC AAT AGC GGC<br>P L K K S E N S T V P S T T N N S G                                                                                                                                                                                                                                                                                                                                                                                                                                                                                                                                                                                                                                                                                                                                                                                                                                                                                                                         | 249 |
| 111 | CGA CAG CCC AAG AAC ATG GAT TTA AGC AGC GCT ATA GCA ACT GCC GTG AAT CAT<br>R Q P K N M D L S S A I A T A V N H                                     | 33  | 813  | AAT AGC GCG ATC GAT TTC CAC GTT GAA ATG GGC GAC ATA CTG GTT GAT ACG ACA<br>N S A I D F H V E M G D L M V D T T                                                                                                                                                                                                                                                                                                                                                                                                                                                                                                                                                                                                                                                                                                                                                                                                                                                                                                                         | 267 |
| 165 | GTT TTG GAC GGA TAC CAG TGG TCT TTG ATT CCG CTG CCT GTG AGA GTC AAC GGT<br>V L D G Y D W S L I P L P V R V N G                                     | 51  | 867  | GAA TTT GAC CAG TAC CTT CAC TCC TAC ACA CAG CCC TTA CAG ATG CCC TCA TCG<br>E F D Q Y L H S Y T Q P L Q M P S S                                                                                                                                                                                                                                                                                                                                                                                                                                                                                                                                                                                                                                                                                                                                                                                                                                                                                                                         | 285 |
| 219 | GGG CAC AAA CAT AAA CCA CAC GTT AAA AGA CCC ATG AAC GCG TTT ATG GTT TGG<br>G H K H K P H V K R R P M N A F M V W                                   | 69  | 921  | CCG CCC TCT GTC ACT TAC ACC TCA CAC GGC GGC GTT TAC ACA CCA ACT ACT CAC<br>P P S V T Y T S H G G V Y T P T T H                                                                                                                                                                                                                                                                                                                                                                                                                                                                                                                                                                                                                                                                                                                                                                                                                                                                                                                         | 303 |
| 273 | GCA CAA GCT GCT AGG AGG AAA CTA GCC GAT CAA TAT CCT CAT CTG CAC AAT GCA<br>A Q A A R R K L A D Q Y P H L H N A                                     | 87  | 975  | GGC GTT TCA AGG TTT GCG CCT AAC AAT AAC CCT GTG ACA TCG AGT TAT ACG GAG<br>G V S R F A P N N N P V T S S Y T E                                                                                                                                                                                                                                                                                                                                                                                                                                                                                                                                                                                                                                                                                                                                                                                                                                                                                                                         | 321 |
| 327 | GAA CTT AGC AAG ACG CTG GGA AAA CTG TGG AAA ATG CTT AAA GAT GCG GAG AAG<br>E L S K T L G K L N K M K L K D A E K                                   | 105 | 1029 | TTT ATG GAC CAA CTT CAA AAA CTG ACA TCG TCC TAC CCA CCG AAT CAG GTT GCC<br>F M E F L Q L K L P S S Y P P N Q V A                                                                                                                                                                                                                                                                                                                                                                                                                                                                                                                                                                                                                                                                                                                                                                                                                                                                                                                       | 339 |
| 381 | AAA CTT TTC ATC GAA GAA GCC GAA GCG CTC AGG CTG CAG CAC AAG GAA GAC CAC<br>K P F I T E E A E R L L K H K K R E H                                   | 123 | 1083 | CCA TCA GCC TTG CAC CAA AAA AAC CTA GAA AAT GGT TCT TTT CCA TTT TCA<br>P S A L H Q R N Q S E N G S F P F S                                                                                                                                                                                                                                                                                                                                                                                                                                                                                                                                                                                                                                                                                                                                                                                                                                                                                                                             | 357 |
| 435 | CCA GAT TAC AAA TAC CCA CCG AGG AGA AAG AAA CAG AAA GAA AAC GGC GGA CCA<br>P D Y K Y Q P R R K K Q K G N G G P                                     | 141 | 1137 | TTT AAC GAC CTT GCC GAC GTA CCA AAC GGT AGC AGT CCT GCA TCC TTT GGA ATC<br>F N E P A D V A N G S S P R S F G I                                                                                                                                                                                                                                                                                                                                                                                                                                                                                                                                                                                                                                                                                                                                                                                                                                                                                                                         | 375 |
| 489 | GAT CAA CCA GAG GCA ACT ATC TCG GCT GAT GAT CTT TTG AAA GTA CTG AAA GGG<br>D Q P E A T I S A D D L L K V L K G                                     | 159 | 1191 | TCC AGT GTG CCT TCC CTC GCG ATT CCC GCA TCT TCG ACA GCC AAC GGA ACA CAG<br>S S V P S L A I P A S S P A N G T Q                                                                                                                                                                                                                                                                                                                                                                                                                                                                                                                                                                                                                                                                                                                                                                                                                                                                                                                         | 393 |
| 543 | GAT CCA CAG GTG GTT GGA AAA TCG ATG AGC CAG GAT AGC AGC TGC GCC AGC CCT<br>D P Q V V G K S M S Q D S S C A S P                                     | 177 | 1245 | AAC CCG CAA AGC TCC CCC TCA AGA CTT CAC ACT CTC ATG TGG AGG TAA GCT TTT<br>N P A Q T S P S P S R L H T L M W K *                                                                                                                                                                                                                                                                                                                                                                                                                                                                                                                                                                                                                                                                                                                                                                                                                                                                                                                       | 408 |
| 597 | GAC AGC AGT TTG AGC GAC GAG GAA AGC AGC CCG GGT TCA AGC AGC CCG GCT ACG<br>D S S L S D E E S S P G S S S P A T                                     | 195 | 1299 | GCA ATA CTC ACG AAC ATT TCG RAG AAT TTT GCT CTT ATG GGG CAC GAA TTT TAA<br>1353 CTT GTT GCT TTC AAG AGC TTT TTA AGT TGC TGG CTA AAA CAA TAC AAG ACT TTA<br>1407 TCT TGT TCT TTT TTT TTA CAG AAA GTT GAA GTT CGA CAC GCC ATA GTT TAT CAA<br>1461 AGC CAG GTT TTC CAA AAC TTC CAT GTT TTT GTG CGC GGC TGC AGT CAA ATT TCA<br>1515 TCG TCA GGT TTT TTT TAC ACA TCA AGC AGG AAG TAA CTA CTC CAT ATT TGA<br>1569 TTT AGA TCT TTT TTT TTT TTT AGT GCT GGT GAG TAA CTT GTT GAA ATT TTT CGG<br>1623 CTT GAT GAG GCT TAC AAA AAA ATT GTT GCC TTT GGT TGC TTT GAG CAG AGT TAA<br>1677 GTT AGC AAC CTG ATC CCA ACT ACT ACT TAC TCT TGA CTT GAT TTA ATT TCT GGA TTA<br>1731 TGA GCT TGC TTT CAA CCA ACT GGT ATT TAT CAT CCT TAC ATC CCC ATG TAC<br>1785 ATA ATT AAT GTG AAT AGG GAT GAT AGC TTT TGA AAA ACT GTA CTT TGA GAA TGA<br>1839 AAA AAT TTT TAC TGA TTT AAT TTT GCC AAA CTT CGA ATT TCT GTG TGC TGG GCT<br>1893 TTA TAT TTT TTG CAA AAA TAA ATA AAA CTA CTT TTG TGC TGC GGA AAA AAA AAA<br>1947 AAA AAA AAA AAA AAA AAA AAT AAA TAA AAA 3' | 231 |

[illegible]
